# Supplementary material for: Solvent effect on the structure and topology of metal-organic frameworks with the rigid tripodal star ligand 1,3,5-tris(1-imidazolyl)benzene and lead(ii) nitrateElectronic supplementary information (ESI) available: crystal packing diagram of 1. See http://www.rsc.org/suppdata/nj/b3/b306876p/
Source: Royal Society of Chemistry journal article supplement (doi:10.1039/b306876p), 2003-01-01
Supplement: b306876p.doc [file b306876p.doc]

**Electronic supplementary information**

Figure S1 Crystal packing diagram of complex **1** on *bc* plane. The hydrogen atoms and counter-ions are omitted for clarity.
